# Supplementary material for: Efficacy of bakuchiol-garlic combination against virulent genes of Candida albicans
Source: PeerJ. 2022 Jan 3;10:e12251. doi: 10.7717/peerj.12251 (PMC8734458; doi:10.7717/peerj.12251)
Supplement: Supplemental Information 1 [file peerj-10-12251-s001.xlsx]

## Sheet: single species
	Specimen #	Ct [GAPDH]	Mean Ct of control [GAPDH]	-∆∆	2-∆∆	Mean fold change in IFN-α gene expression	2-∆∆/Mean fold change in IFN-α gene expression	IFN-α fold change over control (whole group)	Log2 IFN-α fold change (Individual biofilm specimen)
ACT1	1	14	14.2676	0.267575	0.830715	1.01674	0.817039	1	-0.291524
	2	13.9617	14.2676	0.305875	0.808951		0.795634		-0.329824
	3	14.5807	14.2676	-0.313125	1.2424		1.22194		0.289176
	4	14.1346	14.2676	0.132975	0.911949		0.896936		-0.156924
	5	14.0999	14.2676	0.167675	0.890276		0.87562		-0.191624
	6	14.056	14.2676	0.211575	0.863594		0.849377		-0.235524
	7	14.9027	14.2676	-0.635125	1.55307		1.5275		0.611176
	8	14.0637	14.2676	0.203875	0.868215		0.853922		-0.227824
	9	14.3808	14.2676	-0.113225	1.08164		1.06384		0.0892763
	10	14.3685	14.2676	-0.100925	1.07246		1.0548		0.0769763
	11	14.2138	14.2676	0.053775	0.963412		0.947552		-0.0777237
	12	14.1023	14.2676	0.165275	0.891759		0.877078		-0.189224
	13	14.6434	14.2676	-0.375825	1.29758		1.27622		0.351876
	14	14.4337	14.2676	-0.166125	1.12204		1.10357		0.142176
	15	14.2153	14.2676	0.052275	0.964414		0.948537		-0.0762237
	16	14.1241	14.2676	0.143475	0.905336		0.890431		-0.167424
ALS1	17	16.8099	14.2676	-2.54233	5.82527	5.08385	5.72937	5.00016	2.51838
	18	15.9971	14.2676	-1.72953	3.31619		3.26159		1.70558
	19	16.8274	14.2676	-2.55983	5.89636		5.79929		2.53588
	20	15.9143	14.2676	-1.64673	3.13122		3.07967		1.62278
	21	15.7597	14.2676	-1.49213	2.81303		2.76672		1.46818
	22	16.8271	14.2676	-2.55953	5.89514		5.79808		2.53558
	23	16.9662	14.2676	-2.69863	6.49183		6.38495		2.67468
	24	16.9668	14.2676	-2.69923	6.49453		6.38761		2.67528
	25	15.998	14.2676	-1.73043	3.31826		3.26363		1.70648
	26	16.9778	14.2676	-2.71023	6.54424		6.4365		2.68628
	27	16.9995	14.2676	-2.73193	6.64341		6.53404		2.70798
	28	15.5022	14.2676	-1.23463	2.3532		2.31446		1.21068
	29	16.9913	14.2676	-2.72373	6.60576		6.49701		2.69978
	30	15.9699	14.2676	-1.70233	3.25425		3.20068		1.67838
	31	16.9732	14.2676	-2.70563	6.5234		6.41601		2.68168
	32	16.9081	14.2676	-2.64053	6.23559		6.13293		2.61658
ALS3	33	16.1063	14.2676	-1.83873	3.57694	5.10141	3.51805	5.01742	1.81478
	34	16.2483	14.2676	-1.98073	3.94691		3.88194		1.95678
	35	16.5487	14.2676	-2.28113	4.86057		4.78055		2.25718
	36	16.9832	14.2676	-2.71563	6.56878		6.46064		2.69168
	37	17.5988	14.2676	-3.33123	10.0646		9.89896		3.30728
	38	17.2987	14.2676	-3.03113	8.17447		8.03989		3.00718
	39	16.2195	14.2676	-1.95193	3.8689		3.80521		1.92798
	40	16.1088	14.2676	-1.84123	3.58314		3.52415		1.81728
	41	16.0709	14.2676	-1.80333	3.49024		3.43278		1.77938
	42	16.5007	14.2676	-2.23313	4.70151		4.62411		2.20918
	43	16.2786	14.2676	-2.01103	4.03068		3.96433		1.98708
	44	16.5351	14.2676	-2.26753	4.81496		4.7357		2.24358
	45	17.2488	14.2676	-2.98123	7.89656		7.76656		2.95728
	46	16.2192	14.2676	-1.95163	3.8681		3.80442		1.92768
	47	17.0625	14.2676	-2.79493	6.93995		6.8257		2.77098
	48	14.5734	14.2676	-0.305825	1.23613		1.21578		0.281876
HWP1	49	16.8099	14.2676	-2.54233	5.82527	5.09297	5.72937	5.00912	2.51838
	50	16.9771	14.2676	-2.70953	6.54106		6.43338		2.68558
	51	16.8794	14.2676	-2.61183	6.11276		6.01213		2.58788
	52	16.9143	14.2676	-2.64673	6.26244		6.15934		2.62278
	53	16.7997	14.2676	-2.53213	5.78423		5.689		2.50818
	54	16.8271	14.2676	-2.55953	5.89514		5.79808		2.53558
	55	16.9662	14.2676	-2.69863	6.49183		6.38495		2.67468
	56	16.9668	14.2676	-2.69923	6.49453		6.38761		2.67528
	57	17.0028	14.2676	-2.73523	6.65863		6.54901		2.71128
	58	16.9778	14.2676	-2.71023	6.54424		6.4365		2.68628
	59	15.9995	14.2676	-1.73193	3.32171		3.26702		1.70798
	60	15.5088	14.2676	-1.24123	2.36399		2.32507		1.21728
	61	15.9999	14.2676	-1.73233	3.32263		3.26793		1.70838
	62	16.0699	14.2676	-1.80233	3.48782		3.4304		1.77838
	63	15.9732	14.2676	-1.70563	3.2617		3.208		1.68168
	64	15.9089	14.2676	-1.64133	3.11952		3.06817		1.61738
SAP5	65	16.4111	14.2676	-2.14353	4.4184	5.09334	4.34566	5.00949	2.11958
	66	15.9983	14.2676	-1.73073	3.31895		3.26431		1.70678
	67	16.8481	14.2676	-2.58053	5.98157		5.8831		2.55658
	68	16.9832	14.2676	-2.71563	6.56878		6.46064		2.69168
	69	16.8311	14.2676	-2.56353	5.9115		5.81418		2.53958
	70	16.9999	14.2676	-2.73233	6.64526		6.53586		2.70838
	71	15.2195	14.2676	-0.951925	1.93445		1.90261		0.927976
	72	16.9808	14.2676	-2.71323	6.55786		6.4499		2.68928
	73	16.9809	14.2676	-2.71333	6.55831		6.45034		2.68938
	74	16.5007	14.2676	-2.23313	4.70151		4.62411		2.20918
	75	16.9986	14.2676	-2.73103	6.63927		6.52997		2.70708
	76	16.5351	14.2676	-2.26753	4.81496		4.7357		2.24358
	77	16.2488	14.2676	-1.98123	3.94828		3.88328		1.95728
	78	16.2192	14.2676	-1.95163	3.8681		3.80442		1.92768
	79	16.9625	14.2676	-2.69493	6.4752		6.3686		2.67098
	80	15.9234	14.2676	-1.65583	3.15103		3.09916		1.63188

## Sheet: single species (treated)
	Specimen #	Ct [GAPDH]	Mean Ct of control [GAPDH]	-∆∆	2-∆∆	Mean fold change in IFN-α gene expression	2-∆∆/Mean fold change in IFN-α gene expression	IFN-α fold change over control (whole group)	Log2 IFN-α fold change (Individual biofilm specimen)
Control Ca single species	1	14	14.2676	0.267575	0.830715	1.01674	0.817039	1	-0.291524
	2	13.9617	14.2676	0.305875	0.808951		0.795634		-0.329824
	3	14.5807	14.2676	-0.313125	1.2424		1.22194		0.289176
	4	14.1346	14.2676	0.132975	0.911949		0.896936		-0.156924
	5	14.0999	14.2676	0.167675	0.890276		0.87562		-0.191624
	6	14.056	14.2676	0.211575	0.863594		0.849377		-0.235524
	7	14.9027	14.2676	-0.635125	1.55307		1.5275		0.611176
	8	14.0637	14.2676	0.203875	0.868215		0.853922		-0.227824
	9	14.3808	14.2676	-0.113225	1.08164		1.06384		0.0892763
	10	14.3685	14.2676	-0.100925	1.07246		1.0548		0.0769763
	11	14.2138	14.2676	0.053775	0.963412		0.947552		-0.0777237
	12	14.1023	14.2676	0.165275	0.891759		0.877078		-0.189224
	13	14.6434	14.2676	-0.375825	1.29758		1.27622		0.351876
	14	14.4337	14.2676	-0.166125	1.12204		1.10357		0.142176
	15	14.2153	14.2676	0.052275	0.964414		0.948537		-0.0762237
	16	14.1241	14.2676	0.143475	0.905336		0.890431		-0.167424
ALS1	17	16.8099	14.2676	-2.54233	5.82527	3.05807	5.72937	3.00772	2.51838
	18	15.9071	14.2676	-1.63953	3.11563		3.06434		1.61558
	19	15.8274	14.2676	-1.55983	2.94818		2.89965		1.53588
	20	15.9143	14.2676	-1.64673	3.13122		3.07967		1.62278
	21	15.7597	14.2676	-1.49213	2.81303		2.76672		1.46818
	22	15.8271	14.2676	-1.55953	2.94757		2.89904		1.53558
	23	15.9662	14.2676	-1.69863	3.24591		3.19248		1.67468
	24	14.9668	14.2676	-0.699225	1.62363		1.5969		0.675276
	25	15.6714	14.2676	-1.40383	2.64602		2.60246		1.37988
	26	15.9778	14.2676	-1.71023	3.27212		3.21825		1.68628
	27	15.9995	14.2676	-1.73193	3.32171		3.26702		1.70798
	28	15.5022	14.2676	-1.23463	2.3532		2.31446		1.21068
	29	15.9913	14.2676	-1.72373	3.30288		3.24851		1.69978
	30	15.2699	14.2676	-1.00233	2.00323		1.97025		0.978376
	31	15.9732	14.2676	-1.70563	3.2617		3.208		1.68168
	32	15.9081	14.2676	-1.64053	3.11779		3.06646		1.61658
ALS3	33	15.8963	14.2676	-1.62873	3.0924	2.34348	3.04149	2.3049	1.60478
	34	15.9983	14.2676	-1.73073	3.31895		3.26431		1.70678
	35	16.5487	14.2676	-2.28113	4.86057		4.78055		2.25718
	36	14.9832	14.2676	-0.715625	1.64219		1.61516		0.691676
	37	14.8998	14.2676	-0.632225	1.54995		1.52444		0.608276
	38	14.9888	14.2676	-0.721225	1.64858		1.62144		0.697276
	39	14.8995	14.2676	-0.631925	1.54963		1.52412		0.607976
	40	15.9108	14.2676	-1.64323	3.12363		3.07221		1.61928
	41	15.9909	14.2676	-1.72333	3.30197		3.24761		1.69938
	42	15.5007	14.2676	-1.23313	2.35076		2.31206		1.20918
	43	15.2786	14.2676	-1.01103	2.01534		1.98216		0.987076
	44	15.5351	14.2676	-1.26753	2.40748		2.36785		1.24358
	45	15.2488	14.2676	-0.981225	1.97414		1.94164		0.957276
	46	14.8192	14.2676	-0.551625	1.46574		1.44161		0.527676
	47	14.9625	14.2676	-0.694925	1.6188		1.59215		0.670976
	48	14.9234	14.2676	-0.655825	1.57552		1.54958		0.631876
HWP1	49	14.8099	14.2676	-0.542325	1.45632	2.44877	1.43234	2.40846	0.518376
	50	14.9071	14.2676	-0.639525	1.55782		1.53217		0.615576
	51	14.8274	14.2676	-0.559825	1.47409		1.44982		0.535876
	52	14.9143	14.2676	-0.646725	1.56561		1.53984		0.622776
	53	14.7597	14.2676	-0.492125	1.40652		1.38336		0.468176
	54	14.8271	14.2676	-0.559525	1.47378		1.44952		0.535576
	55	14.9662	14.2676	-0.698625	1.62296		1.59624		0.674676
	56	15.9668	14.2676	-1.69923	3.24726		3.19381		1.67528
	57	15.9719	14.2676	-1.70433	3.25876		3.20512		1.68038
	58	15.9778	14.2676	-1.71023	3.27212		3.21825		1.68628
	59	15.9995	14.2676	-1.73193	3.32171		3.26702		1.70798
	60	15.5022	14.2676	-1.23463	2.3532		2.31446		1.21068
	61	15.9913	14.2676	-1.72373	3.30288		3.24851		1.69978
	62	16.0699	14.2676	-1.80233	3.48782		3.4304		1.77838
	63	15.9732	14.2676	-1.70563	3.2617		3.208		1.68168
	64	15.9081	14.2676	-1.64053	3.11779		3.06646		1.61658
SAP5	65	15.8863	14.2676	-1.61873	3.07104	2.24518	3.02048	2.20821	1.59478
	66	15.9983	14.2676	-1.73073	3.31895		3.26431		1.70678
	67	15.9887	14.2676	-1.72113	3.29693		3.24266		1.69718
	68	14.9832	14.2676	-0.715625	1.64219		1.61516		0.691676
	69	14.8398	14.2676	-0.572225	1.48681		1.46234		0.548276
	70	14.9999	14.2676	-0.732325	1.66131		1.63396		0.708376
	71	14.2195	14.2676	0.048075	0.967226		0.951303		-0.0720237
	72	14.9808	14.2676	-0.713225	1.63946		1.61247		0.689276
	73	14.9809	14.2676	-0.713325	1.63958		1.61259		0.689376
	74	14.5007	14.2676	-0.233125	1.17538		1.15603		0.209176
	75	15.9986	14.2676	-1.73103	3.31964		3.26498		1.70708
	76	15.5351	14.2676	-1.26753	2.40748		2.36785		1.24358
	77	15.2488	14.2676	-0.981225	1.97414		1.94164		0.957276
	78	15.2192	14.2676	-0.951625	1.93405		1.90221		0.927676
	79	15.9625	14.2676	-1.69493	3.2376		3.1843		1.67098
	80	15.9234	14.2676	-1.65583	3.15103		3.09916		1.63188

## Sheet: mixed species (untreated)
	Specimen #	Ct [GAPDH]	Mean Ct of control [GAPDH]	-∆∆	2-∆∆	Mean fold change in IFN-α gene expression	2-∆∆/Mean fold change in IFN-α gene expression	IFN-α fold change over control (whole group)	Log2 IFN-α fold change (Individual biofilm specimen)
Control Ca single species	1	14	14.2676	0.267575	0.830715	1.01674	0.817039	1	-0.291524
	2	13.9617	14.2676	0.305875	0.808951		0.795634		-0.329824
	3	14.5807	14.2676	-0.313125	1.2424		1.22194		0.289176
	4	14.1346	14.2676	0.132975	0.911949		0.896936		-0.156924
	5	14.0999	14.2676	0.167675	0.890276		0.87562		-0.191624
	6	14.056	14.2676	0.211575	0.863594		0.849377		-0.235524
	7	14.9027	14.2676	-0.635125	1.55307		1.5275		0.611176
	8	14.0637	14.2676	0.203875	0.868215		0.853922		-0.227824
	9	14.3808	14.2676	-0.113225	1.08164		1.06384		0.0892763
	10	14.3685	14.2676	-0.100925	1.07246		1.0548		0.0769763
	11	14.2138	14.2676	0.053775	0.963412		0.947552		-0.0777237
	12	14.1023	14.2676	0.165275	0.891759		0.877078		-0.189224
	13	14.6434	14.2676	-0.375825	1.29758		1.27622		0.351876
	14	14.4337	14.2676	-0.166125	1.12204		1.10357		0.142176
	15	14.2153	14.2676	0.052275	0.964414		0.948537		-0.0762237
	16	14.1241	14.2676	0.143475	0.905336		0.890431		-0.167424
ALS1	17	16.8099	14.2676	-2.54233	5.82527	9.19211	5.72937	9.04078	2.51838
	18	17.9071	14.2676	-3.63953	12.4625		12.2574		3.61558
	19	17.8274	14.2676	-3.55983	11.7927		11.5986		3.53588
	20	17.9143	14.2676	-3.64673	12.5249		12.3187		3.62278
	21	17.7597	14.2676	-3.49213	11.2521		11.0669		3.46818
	22	17.8271	14.2676	-3.55953	11.7903		11.5962		3.53558
	23	17.9662	14.2676	-3.69863	12.9837		12.7699		3.67468
	24	17.9668	14.2676	-3.69923	12.9891		12.7752		3.67528
	25	17.8671	14.2676	-3.59953	12.1217		11.9222		3.57558
	26	16.9778	14.2676	-2.71023	6.54424		6.4365		2.68628
	27	16.9995	14.2676	-2.73193	6.64341		6.53404		2.70798
	28	16.5022	14.2676	-2.23463	4.7064		4.62892		2.21068
	29	16.9913	14.2676	-2.72373	6.60576		6.49701		2.69978
	30	16.8699	14.2676	-2.60233	6.07264		5.97267		2.57838
	31	16.9732	14.2676	-2.70563	6.5234		6.41601		2.68168
	32	16.9081	14.2676	-2.64053	6.23559		6.13293		2.61658
ALS3	33	17.8099	14.2676	-3.54233	11.6505	9.16673	11.4587	9.01582	3.51838
	34	16.9071	14.2676	-2.63953	6.23126		6.12868		2.61558
	35	17.8274	14.2676	-3.55983	11.7927		11.5986		3.53588
	36	17.9143	14.2676	-3.64673	12.5249		12.3187		3.62278
	37	17.7597	14.2676	-3.49213	11.2521		11.0669		3.46818
	38	17.8271	14.2676	-3.55953	11.7903		11.5962		3.53558
	39	17.9662	14.2676	-3.69863	12.9837		12.7699		3.67468
	40	17.9668	14.2676	-3.69923	12.9891		12.7752		3.67528
	41	17.8671	14.2676	-3.59953	12.1217		11.9222		3.57558
	42	16.9778	14.2676	-2.71023	6.54424		6.4365		2.68628
	43	16.9995	14.2676	-2.73193	6.64341		6.53404		2.70798
	44	16.5022	14.2676	-2.23463	4.7064		4.62892		2.21068
	45	16.9913	14.2676	-2.72373	6.60576		6.49701		2.69978
	46	16.8699	14.2676	-2.60233	6.07264		5.97267		2.57838
	47	16.9732	14.2676	-2.70563	6.5234		6.41601		2.68168
	48	16.9081	14.2676	-2.64053	6.23559		6.13293		2.61658
HWP1	49	17.8099	14.2676	-3.54233	11.6505	9.20456	11.4587	9.05302	3.51838
	50	17.9071	14.2676	-3.63953	12.4625		12.2574		3.61558
	51	17.8274	14.2676	-3.55983	11.7927		11.5986		3.53588
	52	17.9143	14.2676	-3.64673	12.5249		12.3187		3.62278
	53	16.7597	14.2676	-2.49213	5.62606		5.53344		2.46818
	54	17.8271	14.2676	-3.55953	11.7903		11.5962		3.53558
	55	17.9662	14.2676	-3.69863	12.9837		12.7699		3.67468
	56	17.9668	14.2676	-3.69923	12.9891		12.7752		3.67528
	57	17.8671	14.2676	-3.59953	12.1217		11.9222		3.57558
	58	16.9778	14.2676	-2.71023	6.54424		6.4365		2.68628
	59	16.9995	14.2676	-2.73193	6.64341		6.53404		2.70798
	60	16.5022	14.2676	-2.23463	4.7064		4.62892		2.21068
	61	16.9913	14.2676	-2.72373	6.60576		6.49701		2.69978
	62	16.8699	14.2676	-2.60233	6.07264		5.97267		2.57838
	63	16.9732	14.2676	-2.70563	6.5234		6.41601		2.68168
	64	16.9081	14.2676	-2.64053	6.23559		6.13293		2.61658
SAP5	65	16.8099	14.2676	-2.54233	5.82527	9.18219	5.72937	9.03103	2.51838
	66	16.9071	14.2676	-2.63953	6.23126		6.12868		2.61558
	67	17.8274	14.2676	-3.55983	11.7927		11.5986		3.53588
	68	17.9143	14.2676	-3.64673	12.5249		12.3187		3.62278
	69	17.7597	14.2676	-3.49213	11.2521		11.0669		3.46818
	70	17.8271	14.2676	-3.55953	11.7903		11.5962		3.53558
	71	17.9662	14.2676	-3.69863	12.9837		12.7699		3.67468
	72	17.9668	14.2676	-3.69923	12.9891		12.7752		3.67528
	73	17.8671	14.2676	-3.59953	12.1217		11.9222		3.57558
	74	16.9778	14.2676	-2.71023	6.54424		6.4365		2.68628
	75	16.9995	14.2676	-2.73193	6.64341		6.53404		2.70798
	76	16.5022	14.2676	-2.23463	4.7064		4.62892		2.21068
	77	16.9913	14.2676	-2.72373	6.60576		6.49701		2.69978
	78	17.8699	14.2676	-3.60233	12.1453		11.9453		3.57838
	79	16.9732	14.2676	-2.70563	6.5234		6.41601		2.68168
	80	16.9081	14.2676	-2.64053	6.23559		6.13293		2.61658

## Sheet: mixed species (treated) 
	Specimen #	Ct [GAPDH]	Mean Ct of control [GAPDH]	-∆∆	2-∆∆	Mean fold change in IFN-α gene expression	2-∆∆/Mean fold change in IFN-α gene expression	IFN-α fold change over control (whole group)	Log2 IFN-α fold change (Individual biofilm specimen)
Control Ca single species	1	14	14.2676	0.267575	0.830715	1.01674	0.817039	1	-0.291524
	2	13.9617	14.2676	0.305875	0.808951		0.795634		-0.329824
	3	14.5807	14.2676	-0.313125	1.2424		1.22194		0.289176
	4	14.1346	14.2676	0.132975	0.911949		0.896936		-0.156924
	5	14.0999	14.2676	0.167675	0.890276		0.87562		-0.191624
	6	14.056	14.2676	0.211575	0.863594		0.849377		-0.235524
	7	14.9027	14.2676	-0.635125	1.55307		1.5275		0.611176
	8	14.0637	14.2676	0.203875	0.868215		0.853922		-0.227824
	9	14.3808	14.2676	-0.113225	1.08164		1.06384		0.0892763
	10	14.3685	14.2676	-0.100925	1.07246		1.0548		0.0769763
	11	14.2138	14.2676	0.053775	0.963412		0.947552		-0.0777237
	12	14.1023	14.2676	0.165275	0.891759		0.877078		-0.189224
	13	14.6434	14.2676	-0.375825	1.29758		1.27622		0.351876
	14	14.4337	14.2676	-0.166125	1.12204		1.10357		0.142176
	15	14.2153	14.2676	0.052275	0.964414		0.948537		-0.0762237
	16	14.1241	14.2676	0.143475	0.905336		0.890431		-0.167424
ALS1	17	16.8099	14.2676	-2.54233	5.82527	6.92043	5.72937	6.8065	2.51838
	18	15.9071	14.2676	-1.63953	3.11563		3.06434		1.61558
	19	16.8274	14.2676	-2.55983	5.89636		5.79929		2.53588
	20	16.9143	14.2676	-2.64673	6.26244		6.15934		2.62278
	21	15.7597	14.2676	-1.49213	2.81303		2.76672		1.46818
	22	16.8271	14.2676	-2.55953	5.89514		5.79808		2.53558
	23	16.9662	14.2676	-2.69863	6.49183		6.38495		2.67468
	24	16.9668	14.2676	-2.69923	6.49453		6.38761		2.67528
	25	16.6718	14.2676	-2.40423	5.29351		5.20636		2.38028
	26	17.5278	14.2676	-3.26023	9.58132		9.42359		3.23628
	27	17.9295	14.2676	-3.66193	12.6575		12.4492		3.63798
	28	16.5022	14.2676	-2.23463	4.7064		4.62892		2.21068
	29	17.9913	14.2676	-3.72373	13.2115		12.994		3.69978
	30	16.0699	14.2676	-1.80233	3.48782		3.4304		1.77838
	31	16.9732	14.2676	-2.70563	6.5234		6.41601		2.68168
	32	17.9081	14.2676	-3.64053	12.4712		12.2659		3.61658
ALS3	33	16.5563	14.2676	-2.28873	4.88624	4.47768	4.8058	4.40396	2.26478
	34	16.7583	14.2676	-2.49073	5.6206		5.52807		2.46678
	35	15.5487	14.2676	-1.28113	2.43028		2.39027		1.25718
	36	16.9832	14.2676	-2.71563	6.56878		6.46064		2.69168
	37	16.8398	14.2676	-2.57223	5.94726		5.84935		2.54828
	38	16.8774	14.2676	-2.60983	6.1043		6.0038		2.58588
	39	16.2195	14.2676	-1.95193	3.8689		3.80521		1.92798
	40	16.9108	14.2676	-2.64323	6.24727		6.14442		2.61928
	41	16.0709	14.2676	-1.80333	3.49024		3.43278		1.77938
	42	16.5007	14.2676	-2.23313	4.70151		4.62411		2.20918
	43	16.2786	14.2676	-2.01103	4.03068		3.96433		1.98708
	44	16.5351	14.2676	-2.26753	4.81496		4.7357		2.24358
	45	15.2488	14.2676	-0.981225	1.97414		1.94164		0.957276
	46	16.2192	14.2676	-1.95163	3.8681		3.80442		1.92768
	47	16.0625	14.2676	-1.79493	3.46997		3.41285		1.77098
	48	16.1234	14.2676	-1.85583	3.61959		3.56		1.83188
HWP1	49	17.8099	14.2676	-3.54233	11.6505	8.14096	11.4587	8.00694	3.51838
	50	18.9071	14.2676	-4.63953	24.9251		24.5147		4.61558
	51	17.8274	14.2676	-3.55983	11.7927		11.5986		3.53588
	52	16.9143	14.2676	-2.64673	6.26244		6.15934		2.62278
	53	16.7597	14.2676	-2.49213	5.62606		5.53344		2.46818
	54	16.8271	14.2676	-2.55953	5.89514		5.79808		2.53558
	55	16.9662	14.2676	-2.69863	6.49183		6.38495		2.67468
	56	16.9668	14.2676	-2.69923	6.49453		6.38761		2.67528
	57	17.9671	14.2676	-3.69953	12.9918		12.7779		3.67558
	58	17.9778	14.2676	-3.71023	13.0885		12.873		3.68628
	59	16.1015	14.2676	-1.83393	3.56506		3.50637		1.80998
	60	16.5022	14.2676	-2.23463	4.7064		4.62892		2.21068
	61	16.9913	14.2676	-2.72373	6.60576		6.49701		2.69978
	62	16.0699	14.2676	-1.80233	3.48782		3.4304		1.77838
	63	16.0032	14.2676	-1.73563	3.33024		3.27541		1.71168
	64	16.0081	14.2676	-1.74053	3.34157		3.28656		1.71658
SAP5	65	16.1063	14.2676	-1.83873	3.57694	5.71416	3.51805	5.62008	1.81478
	66	16.9783	14.2676	-2.71073	6.54651		6.43873		2.68678
	67	16.8801	14.2676	-2.61253	6.11573		6.01505		2.58858
	68	16.9832	14.2676	-2.71563	6.56878		6.46064		2.69168
	69	16.8398	14.2676	-2.57223	5.94726		5.84935		2.54828
	70	16.9998	14.2676	-2.73223	6.6448		6.5354		2.70828
	71	16.2195	14.2676	-1.95193	3.8689		3.80521		1.92798
	72	16.9811	14.2676	-2.71353	6.55922		6.45124		2.68958
	73	16.9801	14.2676	-2.71253	6.55468		6.44677		2.68858
	74	16.5007	14.2676	-2.23313	4.70151		4.62411		2.20918
	75	16.9986	14.2676	-2.73103	6.63927		6.52997		2.70708
	76	16.5351	14.2676	-2.26753	4.81496		4.7357		2.24358
	77	17.2488	14.2676	-2.98123	7.89656		7.76656		2.95728
	78	16.2192	14.2676	-1.95163	3.8681		3.80442		1.92768
	79	16.7625	14.2676	-2.49493	5.63699		5.54419		2.47098
	80	16.7234	14.2676	-2.45583	5.48627		5.39595		2.43188
